# Supplementary figures and images for: Enhanced photocatalytic performance of the N-rGO/g-C3N4 nanocomposite for efficient solar-driven water remediation
Source: Royal Society of Chemistry journal article supplement (doi:10.1039/d3nr06203a), 2024-01-01

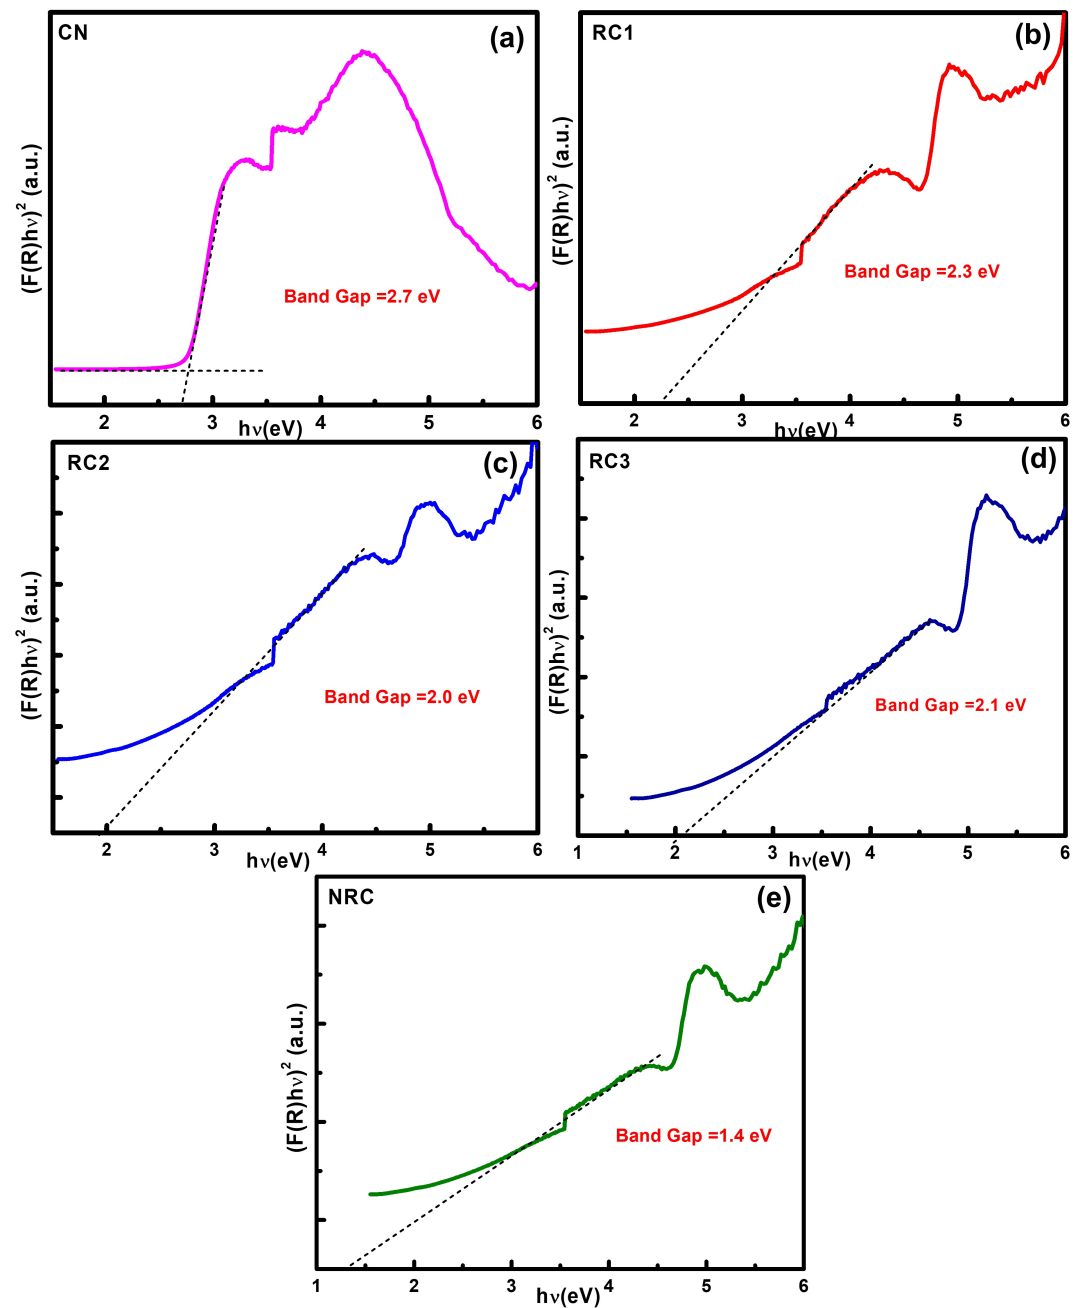

Supplement: d3nr06203a2.pdf [file d3nr06203a2.pdf]

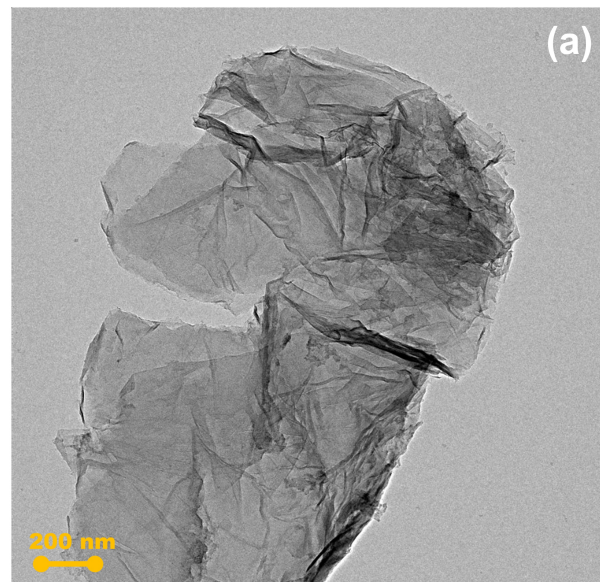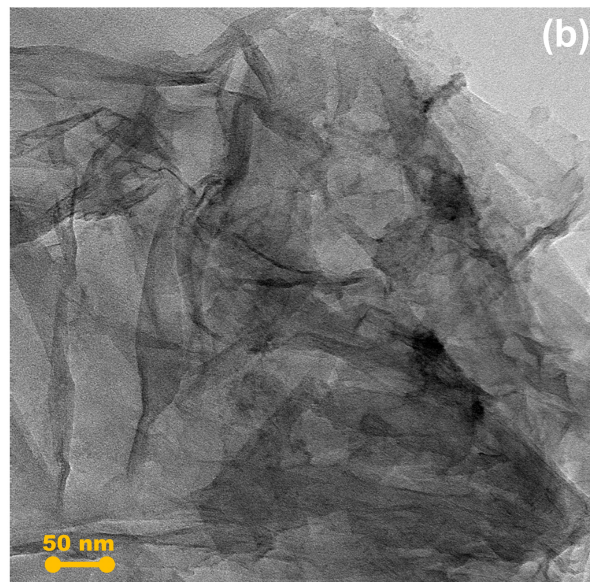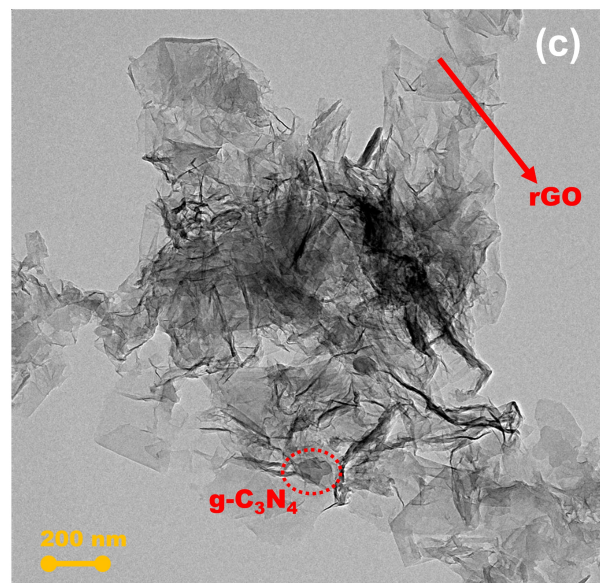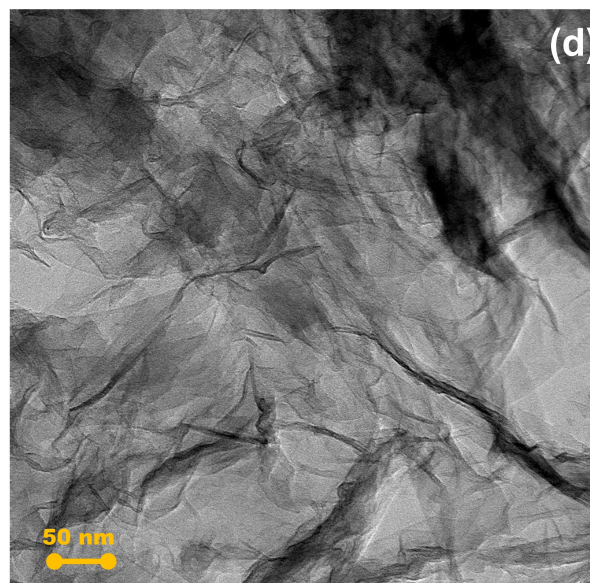

Supplement: d3nr06203a3.pdf [file d3nr06203a3.pdf]

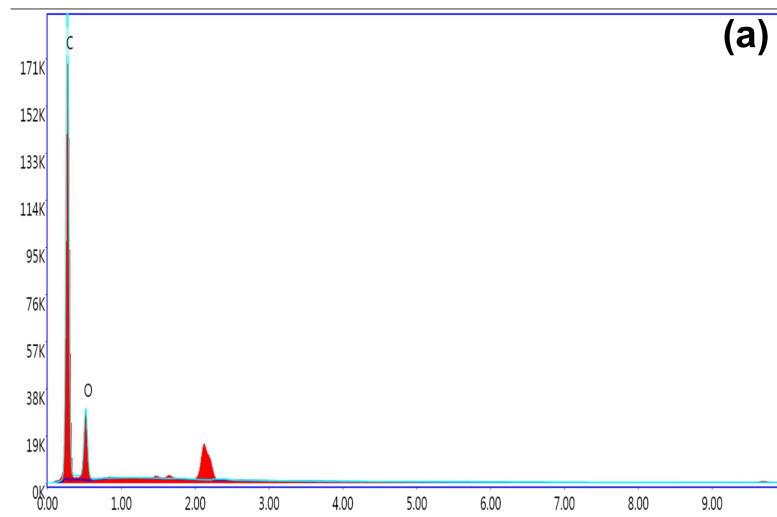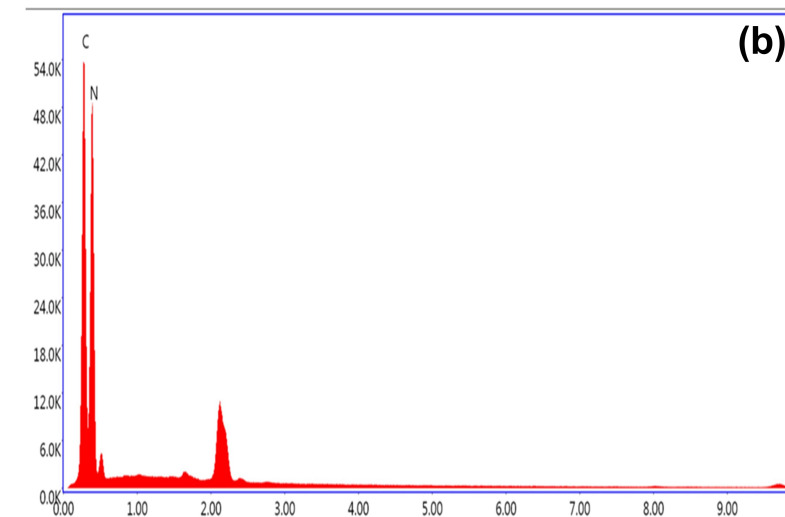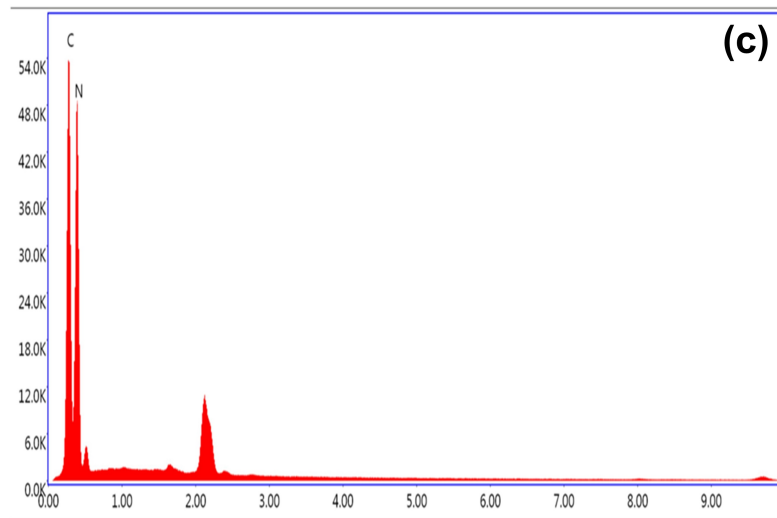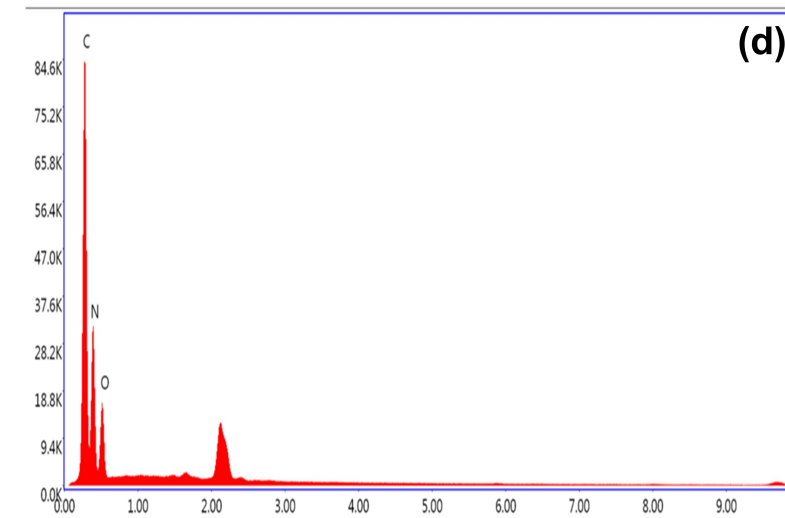

Supplement: d3nr06203a4.pdf [file d3nr06203a4.pdf]
